# Supplementary material for: The Secretome of Parental and Bone Metastatic Breast Cancer Elicits Distinct Effects in Human Osteoclast Activity after Activation of β2 Adrenergic Signaling
Source: MDPI journal article supplement (doi:10.3390/biom13040622), 2023-03-30
Supplement: s1 [file s1]

**Table S1.** Description of the cohort of BC patients.

|                        |                         | Median age<br>(min-max) | Primary<br>Tumor | Molecular<br>Subtype | Menopausal<br>Status | Distant<br>metastasis<br>Site at<br>Diagnosis |
|------------------------|-------------------------|-------------------------|------------------|----------------------|----------------------|-----------------------------------------------|
| Healthy<br>Donors      |                         | 57 (46-65)              | N/A              | N/A                  | N/A                  | N/A                                           |
|                        | Donor 1                 | 62                      | N/A              | N/A                  | N/A                  | N/A                                           |
|                        | Donor 2                 | 58                      | N/A              | N/A                  | N/A                  | N/A                                           |
|                        | Donor 3                 | 57                      | N/A              | N/A                  | N/A                  | N/A                                           |
|                        | Donor 4                 | 48                      | N/A              | N/A                  | N/A                  | N/A                                           |
|                        | Donor 5                 | 62                      | N/A              | N/A                  | N/A                  | N/A                                           |
|                        | Donor 6                 | 46                      | N/A              | N/A                  | N/A                  | N/A                                           |
|                        | Donor 7                 | 56                      | N/A              | N/A                  | N/A                  | N/A                                           |
|                        | Donor 8                 | 65                      | N/A              | N/A                  | N/A                  | N/A                                           |
|                        | Donor 9                 | 56                      | N/A              | N/A                  | N/A                  | N/A                                           |
|                        | Donor 10                | 51                      | N/A              | N/A                  | N/A                  | N/A                                           |
|                        | Donor 11                | 64                      | N/A              | N/A                  | N/A                  | N/A                                           |
|                        | Donor 12                | 57                      | N/A              | N/A                  | N/A                  | N/A                                           |
| Stage I BC<br>patients |                         | 64 (45-71)              | T1               | Luminal-<br>like     |                      | N/A                                           |
|                        | Patient 1               | 45                      | T1               | Luminal<br>B-like    | Premenopau<br>sal    | N/A                                           |
|                        | Patient 2               | 61                      | T1               | Luminal<br>B-like    | Postmenopa<br>usal   | N/A                                           |
|                        | Patient 3               | 66                      | T1               | Luminal<br>B-like    | Postmenopa<br>usal   | N/A                                           |
|                        | Patient 4               | 68                      | T1               | Luminal<br>A-like    | Postmenopa<br>usal   | N/A                                           |
|                        | Patient5                | 71                      | T1               | Luminal<br>A-like    | Postmenopa<br>usal   | N/A                                           |
|                        | Patient 6               | 69                      | T1               | Luminal<br>B-like    | Postmenopa<br>usal   | N/A                                           |
|                        | Patient 7               | 68                      | T1               | Luminal<br>B-like    | Postmenopa<br>usal   | N/A                                           |
|                        | Patient 8               | 68                      | T1               | Luminal<br>B-like    | Postmenopa<br>usal   | N/A                                           |
|                        | Patient 9               | 67                      | T1               | Luminal<br>B-like    | Postmenopa<br>usal   | N/A                                           |
|                        | Patient 10              | 63                      | T1               | Luminal<br>B-like    | Postmenopa<br>usal   | N/A                                           |
|                        | Patient 11              | 61                      | T1               | Luminal<br>A-like    | Postmenopa<br>usal   | N/A                                           |
|                        | Patient 12              | 56                      | T1               | Luminal<br>A-like    | Postmenopa<br>usal   | N/A                                           |
|                        | Stage IV BC<br>patients |                         | 55 (41-71)       |                      | Luminal-<br>like     |                                               |
| Patient 1              |                         | 59                      | T3               | Luminal<br>B-like    | Postmenopa<br>usal   | Bone                                          |
| Patient 2              |                         | 52                      | N/A              | Luminal<br>A-like    | Postmenopa<br>usal   | Bone                                          |
| Patient 3              |                         | 64                      | N/A              | Luminal<br>B-like    | Postmenopa<br>usal   | Lung, Bone,<br>Brain                          |
| Patient 4              |                         | 71                      | N/A              | Luminal<br>B-like    | Postmenopa<br>usal   | Bone, Liver,<br>Lung                          |
| Patient 5              |                         | 51                      | T2               | Luminal<br>B-like    | N/A                  | Skin, Lung,<br>Bone                           |
| Patient 6              |                         | 57                      | T3               | Luminal<br>B-like    | Premenopau<br>sal    | Bone                                          |

|            |    |     |                |                |                   |
|------------|----|-----|----------------|----------------|-------------------|
| Patient 7  | 53 | N/A | Luminal B-like | Postmenopausal | Bone              |
| Patient 8  | 51 | N/A | Luminal B-like | Premenopausal  | Bone              |
| Patient 9  | 44 | T3  | Luminal A-like | Premenopausal  | Bone, Lung        |
| Patient 10 | 56 | T4  | Luminal B-like | Postmenopausal | Bone, Liver, Skin |
| Patient 11 | 58 | T4  | Luminal A-like | Postmenopausal | Bone              |
| Patient 12 | 41 | T3  | Luminal A-like | Premenopausal  | Bone              |

N/A – Not applicable/available

**Table S2.** Protein abundance ratio comparison between ISO treated MDA-231 and control MDA-231 samples

| <b>Gene Symbol</b> | <b>Abundance Ratio (ISOvsCTRL)</b> | <b>P value</b> |
|--------------------|------------------------------------|----------------|
| <i>CDH6</i>        | 100                                | 3,4E-16        |
| <i>MCFD2</i>       | 100                                | 3,4E-16        |
| <i>IGFBP1</i>      | 2,976                              | 3,4E-16        |
| <i>ALDOB</i>       | 2,802                              | 3,4E-16        |
| <i>MAN2B1</i>      | 2,976                              | 3,4E-16        |
| <i>STC1</i>        | 2,652                              | 3,4E-16        |
| <i>PLAU</i>        | 2,568                              | 3,4E-16        |
| <i>ABCA10</i>      | 2,239                              | 7,16E-12       |
| <i>VNN1</i>        | 2,084                              | 6,54E-10       |
| <i>FABP1</i>       | 1,993                              | 8,52E-09       |
| <i>TARS1</i>       | 1,923                              | 6,06E-08       |
| <i>BRD9</i>        | 1,878                              | 2,23E-07       |
| <i>IGFBP4</i>      | 1,866                              | 3E-07          |
| <i>PTK2B</i>       | 1,754                              | 4,9E-06        |
| <i>WASHC4</i>      | 1,727                              | 9,58E-06       |
| <i>PRC1</i>        | 1,605                              | 0,000169       |
| <i>CLU</i>         | 1,596                              | 0,000213       |
| <i>SERPINB4</i>    | 1,566                              | 0,000425       |
| <i>CTSL</i>        | 1,508                              | 0,001531       |
| <i>TPR</i>         | 1,467                              | 0,003897       |
| <i>HOOK3</i>       | 1,466                              | 0,00398        |
| <i>DDX39A</i>      | 1,451                              | 0,00539        |
| <i>CTSD</i>        | 1,447                              | 0,005945       |
| <i>C6</i>          | 1,391                              | 0,018738       |
| <i>PLAUR</i>       | 1,382                              | 0,02224        |
| <i>H2BC21</i>      | 1,365                              | 0,028902       |
| <i>SRGN</i>        | 1,347                              | 0,03991        |
| <i>IGFBP7</i>      | 1,331                              | 0,053154       |
| <i>GSTO1</i>       | 0,01                               | 3,4E-16        |
| <i>PBX4</i>        | 0,01                               | 3,4E-16        |
| <i>NCAN</i>        | 0,035                              | 3,4E-16        |
| <i>CPPED1</i>      | 0,288                              | 3,4E-16        |
| <i>SLC25A13</i>    | 0,341                              | 3,4E-16        |
| <i>TTN</i>         | 0,386                              | 3,4E-16        |
| <i>DSC1</i>        | 0,404                              | 6,42E-15       |
| <i>KRT10</i>       | 0,52                               | 5,62E-08       |
| <i>KRT9</i>        | 0,534                              | 2,23E-07       |
| <i>LMNA</i>        | 0,56                               | 1,95E-06       |
| <i>SERPINE1</i>    | 0,588                              | 1,76E-05       |
| <i>IGFN1</i>       | 0,588                              | 1,76E-05       |
| <i>KRT1</i>        | 0,609                              | 7,89E-05       |
| <i>MMP1</i>        | 0,611                              | 9,14E-05       |
| <i>NPM1</i>        | 0,636                              | 0,000337       |
| <i>CENPE</i>       | 0,639                              | 0,000404       |
| <i>MAN2A1</i>      | 0,643                              | 0,000495       |
| <i>KISS1</i>       | 0,644                              | 0,000527       |
| <i>CCN2</i>        | 0,646                              | 0,000604       |
| <i>ANXA2</i>       | 0,654                              | 0,000862       |
| <i>ARHGDIA</i>     | 0,666                              | 0,001608       |
| <i>COL6A2</i>      | 0,677                              | 0,002907       |
| <i>FBP1</i>        | 0,679                              | 0,003171       |
| <i>VIM</i>         | 0,703                              | 0,009364       |
| <i>EIF5A1</i>      | 0,708                              | 0,011596       |
| <i>KRT14</i>       | 0,718                              | 0,016761       |
| <i>ADH5</i>        | 0,723                              | 0,020352       |
| <i>ATP5F1A</i>     | 0,729                              | 0,025211       |
| <i>TERT</i>        | 0,731                              | 0,02716        |

|               |       |          |
|---------------|-------|----------|
| <i>ANPEP</i>  | 0,739 | 0,03368  |
| <i>GOT1</i>   | 0,739 | 0,03429  |
| <i>AKAP13</i> | 0,741 | 0,035427 |
| <i>HADHB</i>  | 0,741 | 0,03574  |
| <i>COL9A1</i> | 0,747 | 0,044673 |
| <i>PLXNB2</i> | 0,751 | 0,049436 |
| <i>VPS45</i>  | 0,753 | 0,053683 |

**Table S3.** Protein abundance ratio comparison between ISO treated MDA-1833 and ISO treated MDA-231 samples.

| Gene Symbol | Abundance Ratio (1833 ISO vs 231 ISO) | P value  |
|-------------|---------------------------------------|----------|
| VCP         | 100                                   | 2,91E-16 |
| GSTO1       | 100                                   | 2,91E-16 |
| SLC25A13    | 2,985                                 | 1,19E-11 |
| DSC1        | 2,539                                 | 2,23E-08 |
| PTX3        | 2,526                                 | 2,72E-08 |
| PSAP        | 2,314                                 | 8,84E-07 |
| KRT10       | 2,31                                  | 9,32E-07 |
| VNN1        | 2,184                                 | 7,5E-06  |
| MT1L        | 1,995                                 | 0,000141 |
| KRT14       | 1,971                                 | 0,000142 |
| PLVAP       | 1,956                                 | 0,000171 |
| TPR         | 1,956                                 | 0,000173 |
| RPL29       | 1,939                                 | 0,000221 |
| ANPEP       | 1,921                                 | 0,000294 |
| MCFD2       | 1,782                                 | 0,002194 |
| PEPD        | 1,777                                 | 0,002374 |
| DMBT1       | 1,753                                 | 0,003348 |
| NACA        | 1,733                                 | 0,004404 |
| KRT1        | 1,733                                 | 0,004408 |
| LRRRC8A     | 1,693                                 | 0,007781 |
| PLG         | 1,671                                 | 0,01031  |
| CCN2        | 1,642                                 | 0,014896 |
| GRN         | 1,64                                  | 0,015265 |
| IGF2        | 1,627                                 | 0,017886 |
| OPA1        | 1,624                                 | 0,018592 |
| NPM1        | 1,601                                 | 0,024787 |
| FKBP1A      | 1,593                                 | 0,027353 |
| TTR         | 1,589                                 | 0,028658 |
| CPPED1      | 1,563                                 | 0,038659 |
| KRT9        | 1,551                                 | 0,045396 |
| TMEM132C    | 1,548                                 | 0,04683  |
| RCN1        | 0,737                                 | 0,050725 |
| MYOM2       | 0,727                                 | 0,038623 |
| IGFBP4      | 0,724                                 | 0,036342 |
| IGFBP3      | 0,723                                 | 0,035024 |
| HGD         | 0,72                                  | 0,032832 |
| TIMP2       | 0,719                                 | 0,031821 |
| C4BPA       | 0,719                                 | 0,03205  |
| ITIH2       | 0,714                                 | 0,027865 |
| HBB         | 0,714                                 | 0,028367 |
| CD44        | 0,708                                 | 0,023916 |
| HLA-A       | 0,701                                 | 0,019793 |
| OAF         | 0,679                                 | 0,01009  |
| TPM1        | 0,676                                 | 0,009081 |
| CTSZ        | 0,665                                 | 0,006297 |
| APP         | 0,659                                 | 0,005054 |
| DDX39A      | 0,657                                 | 0,004593 |
| TNC         | 0,637                                 | 0,002221 |
| FBP1        | 0,627                                 | 0,00146  |
| IGFBP7      | 0,585                                 | 0,000214 |
| CST3        | 0,581                                 | 0,000174 |
| PTK2B       | 0,58                                  | 0,00017  |
| MMP1        | 0,568                                 | 0,000134 |
| PIIB        | 0,546                                 | 3,84E-05 |
| THBS2       | 0,545                                 | 3,74E-05 |
| SPARC       | 0,496                                 | 1,29E-06 |
| SERPINE1    | 0,493                                 | 1,06E-06 |

|                 |       |          |
|-----------------|-------|----------|
| <i>STC1</i>     | 0,491 | 8,84E-07 |
| <i>RNASET2</i>  | 0,457 | 5,2E-08  |
| <i>VN1R5</i>    | 0,45  | 2,72E-08 |
| <i>RPLP2</i>    | 0,442 | 1,37E-08 |
| <i>IGFN1</i>    | 0,438 | 8,98E-09 |
| <i>CTSL</i>     | 0,418 | 1,09E-09 |
| <i>PLAUR</i>    | 0,332 | 6,37E-15 |
| <i>IGFBP1</i>   | 0,267 | 2,91E-16 |
| <i>LOX</i>      | 0,237 | 2,91E-16 |
| <i>WASHC4</i>   | 0,206 | 2,91E-16 |
| <i>SERPINB2</i> | 0,01  | 2,91E-16 |
| <i>SET</i>      | 0,01  | 2,91E-16 |
